# Supplementary material for: Distribution of Paraoxonase‐1 (PON‐1) and Lipoprotein Phospholipase A2 (Lp‐PLA2) across Lipoprotein Subclasses in Subjects with Type 2 Diabetes
Source: Hindawi journal article supplement (doi:10.1155/2018/1752940), 2018-01-01
Supplement: f1 [file 1752940.f1.pdf]

Supplementary Figure 1.

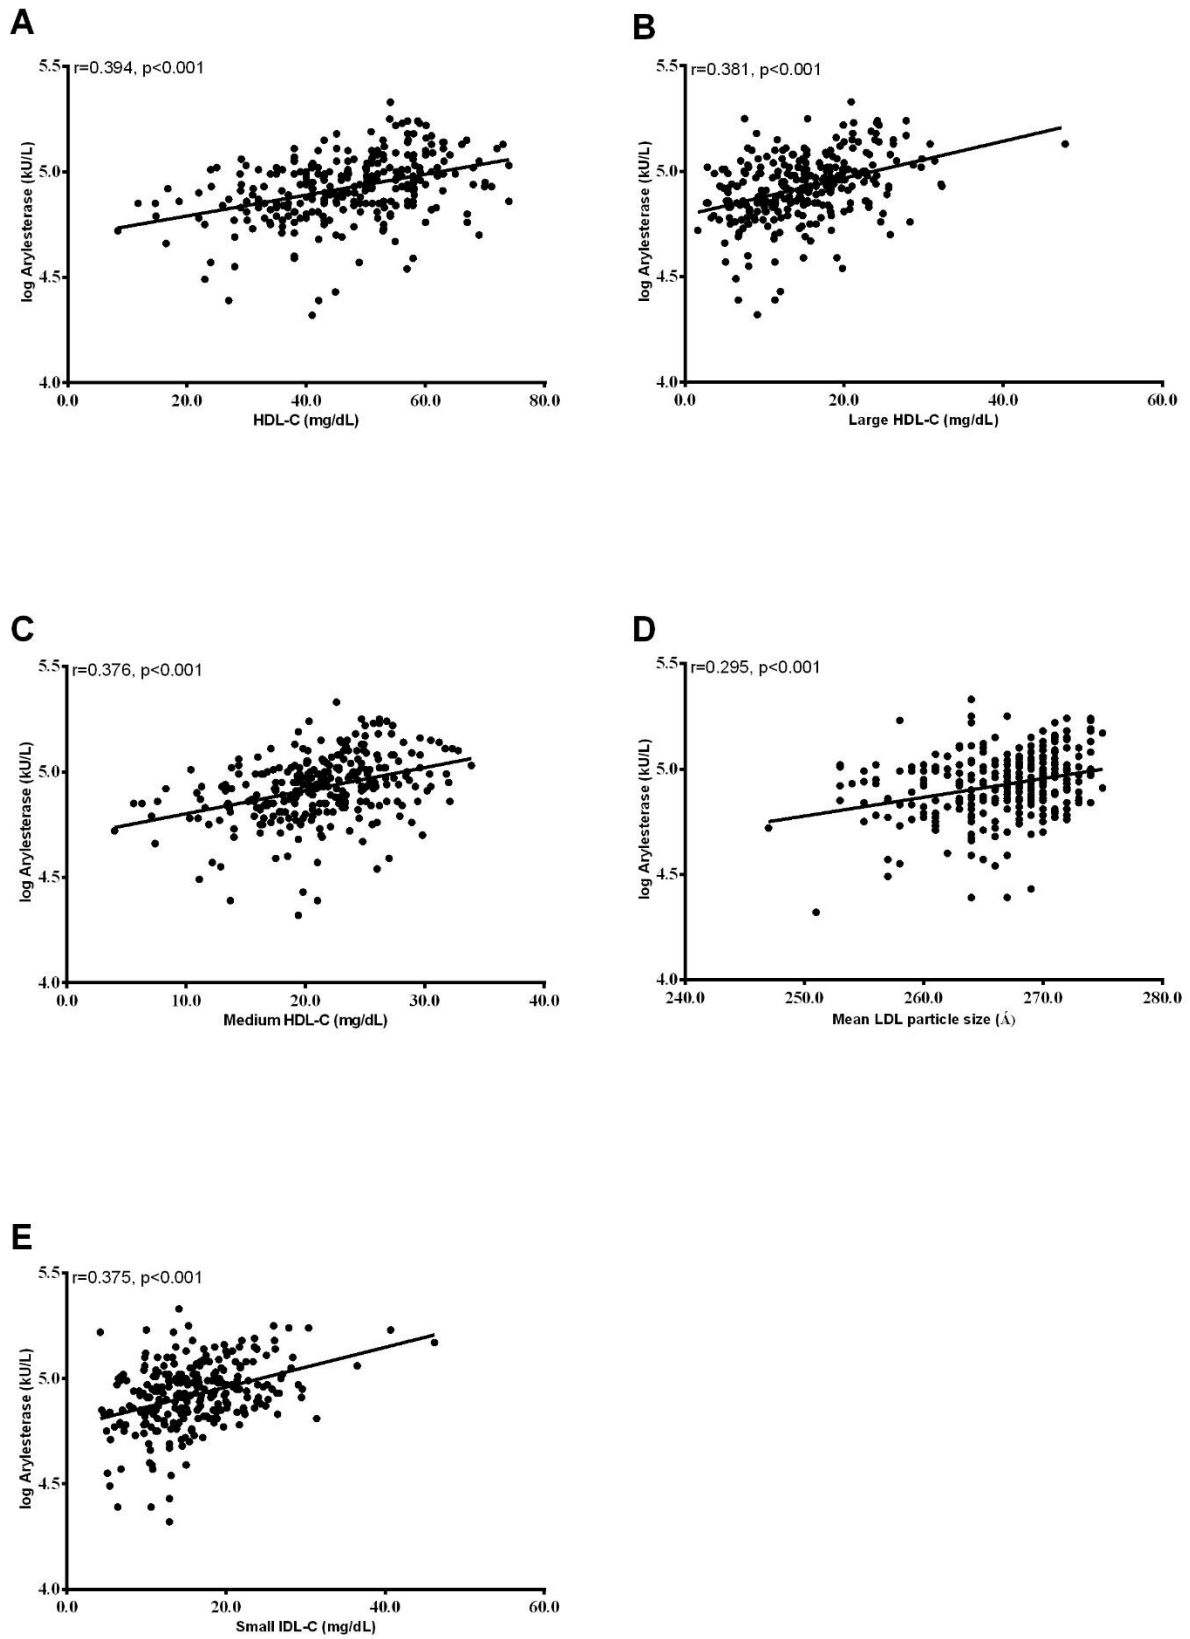

**Supplemental Table 1.** PON1-Arylesterase in Controls and T2DM subjects with similar age and gender prevalence

|                                     | T2DM*            | Control*        | p value          |
|-------------------------------------|------------------|-----------------|------------------|
|                                     | (n=85)           | (n= 85)         |                  |
| Arylesterase (KU/L)                 | 73 ± 24          | 82 ± 20         | 0.003            |
| Age (years)                         | 63 ± 8           | 65 ± 9          | 0.700            |
| Gender (women/men)                  | 35/50            | 35/50           | 1.00             |
| <b>BMI (Kg/m<sup>2</sup>)</b>       | <b>31 ± 4</b>    | <b>27 ± 5</b>   | <b>&lt;0.001</b> |
| <b>Smoking (% never/ex/current)</b> | <b>39 /43/18</b> | <b>35/37/18</b> | <b>&lt;0.001</b> |
| <b>Glucose (mg/dL)</b>              | <b>145 ± 35</b>  | <b>99 ± 9</b>   | <b>&lt;0.001</b> |
| <b>Hypertension (%)</b>             | <b>80</b>        | <b>36</b>       | <b>&lt;0.001</b> |

Data are expressed as means ± standard deviations for continuous variables and number or percentage within the group for categorical variables. Abbreviations: BMI, body mass index

\*Subsets extracted from total sample

**Supplemental Table 2.** Main characteristics and serum levels of PON1-Arylesterase, PON1-Lactonase and Lp-PLA2 activities of Controls and T2DM subjects (Lipoprint subsample, n=292)

|                              | T2DM<br>(n=90) | Controls<br>(n= 202) | p value |
|------------------------------|----------------|----------------------|---------|
| Age (years)                  | 66 ± 10        | 56 ± 11              | <0.001  |
| Gender (Women/Men)           | 35/55          | 139/63               | <0.001  |
| BMI (Kg/m <sup>2</sup> )     | 32 ± 5         | 26 ± 5               | <0.001  |
| Glucose (mg/dL)              | 149 ± 40       | 98 ± 12              | <0.001  |
| Smoking (% never/ex/current) | 34 /46         | 49/1/49              | <0.001  |
| Hypertension (%)             | 93             | 58                   | <0.001  |
| Dyslipidemia (%)             | 98             | 54                   | <0.001  |
| Enzyme activities            |                |                      |         |
| Arylesterase (KU/L)          | 75 ± 20        | 96 ± 31              | <0.001  |
| Lactonase (U/L)#             | 94 ± 25        | 98 ± 22              | 0.274   |
| Lp-PLA2 (U/L)#               | 15 ± 5         | 14 ± 3               | 0.431   |

Data are expressed as means ± standard deviations for continuous variables and number or percentage within the group for categorical variables

Abbreviations: BMI, body mass index

#Lactonase was measured in 152/202 Controls; Lp-PLA<sub>2</sub> was measured in 111/202 Controls
